# Supplementary material for: Reduced graphene oxide/gold nanoparticle aerogel for catalytic reduction of 4-nitrophenol
Source: Royal Society of Chemistry journal article supplement (doi:10.1039/c6ra09386h), 2016-01-01

# **Reduced Graphene Oxide/Gold Nanoparticle Aerogel for Catalytic Reduction of 4-Nitrophenol**

Xinjiang Cao<sup>1</sup>, Shancheng Yan<sup>2</sup>, Feihu Hu<sup>1,3</sup>, Junhua Wang<sup>1</sup>, Yiming Wan<sup>1</sup>, Bo Sun<sup>1</sup>,

Zhongdang Xiao<sup>1\*</sup>

1. State Key Laboratory of Bioelectronics (Chien-Shiung Wu Lab), School of  
Biological Science & Medical Engineering, Southeast University, Si Pai Lou 2#,  
Nanjing 210096, P. R. China

2. School of Geography and Biological Information, Nanjing University of Posts and  
Telecommunications, Nanjing 210046, P. R. China

3. Medical School, Southeast University, Nanjing, P. R. China

Corresponding author: [zdxiao@seu.edu.cn](mailto:zdxiao@seu.edu.cn)

Tel: +86 25-83790820;

Fax: +86 25-83795635

**Fig. S1.** (a, b) The FESEM images of rGO aerogel at different magnifications.

**Fig. S2.** Contrastive catalytic activity for the reduction of 4-NP monitored by UV-vis spectroscopy: (a) 3D rGO/Au NPA without NaBH<sub>4</sub>; (b) rGO aerogel in the presence of NaBH<sub>4</sub>; (c) Pure Au NPs in the presence of NaBH<sub>4</sub>.

**Fig. S1**

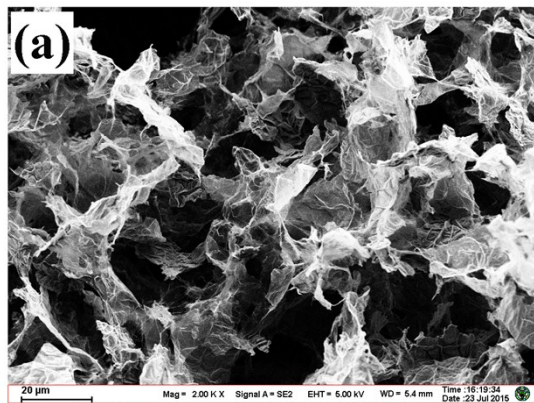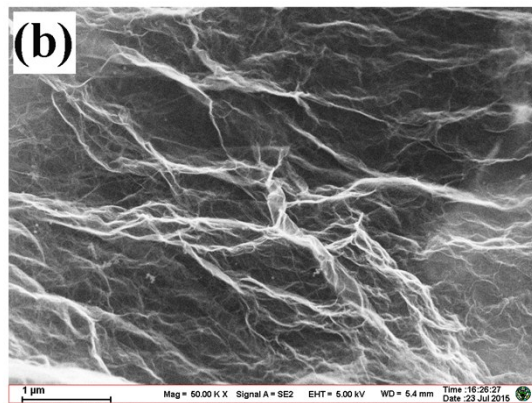

**Fig. S2**

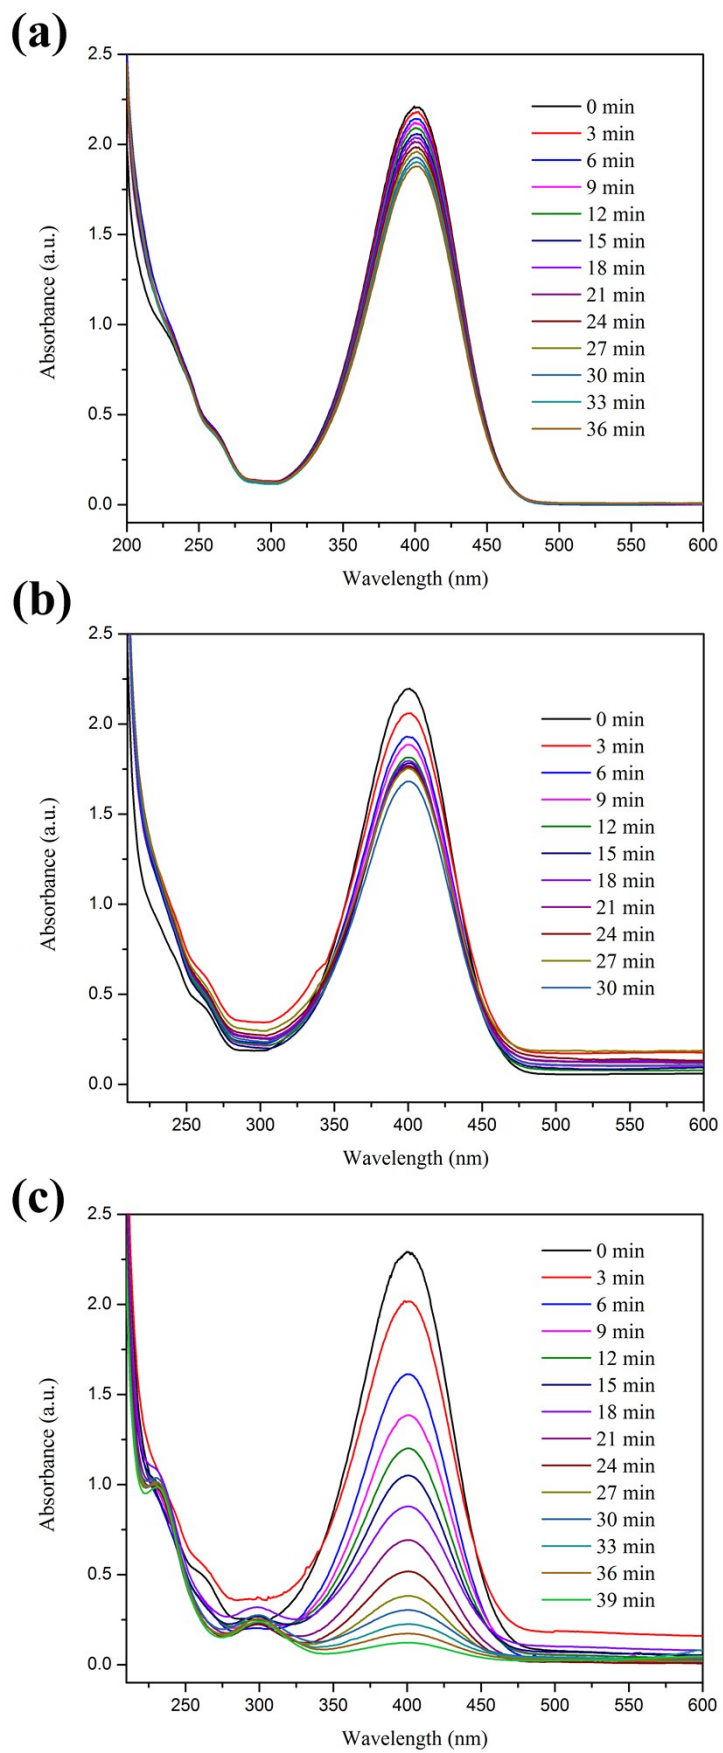

Supplement: c6ra09386h1.pdf [file c6ra09386h1.pdf]
